# Supplementary material for: Urinary 8-OHdG as a Biomarker for Oxidative Stress: A Systematic Literature Review and Meta-Analysis
Source: Int J Mol Sci. 2020 May 26;21(11):3743. doi: 10.3390/ijms21113743 (PMC7313038; doi:10.3390/ijms21113743)
Supplement: Supplementary file 1 [file ijms-21-03743-s001.xlsx]

## Sheet: S1_Quality_Assessement_Criteria
Criteria for quality appraisal	Instructions for assessment	Number of points for Quality scoring
		1 point	2 points	3 points
I. Study sample quality
I.1. Representativeness of the study sample	The sample design and sample construction strategy should be clearly described in the article. If not, please consider the inclusion and exclusion criteria	Convenience sample	Consecutive sample	Probability sample (simple random sample, systematic sample, stratified random sample or cluster sample)
I.2. Between group comparability and potential for selection bias	To appraise this criteria, please consider the inclusion and exclusion criteria in each of the groups considered, depending on the study design (exposed/ unexposed or healthy/ ill) and the comparability of the groups finally selected in terms of all criteria except the exposure or the health outcome (statistical tests or sample descriptive statistics)	The cases and controls or exposed and unexposed participants are selected from the different settings and present different social, demographical, and biological characteristics (p-values < 0.05 or not reported, or not assessed)	An intermediate situation, where the groups are somehow comparable, because of the same criteria or the target/ accessible population used for the participant selection, and somehow comparable descriptive statistics between groups (no statistically significant difference for most of the characteristics between groups	The cases and controls or exposed and unexposed participants are selected from the same population, based on the same inclusion/ exclusion criteria and participation rate is similar in the both groups. Moreover, the statistical comparison of the groups did not reveal any statistically significant difference in terms of participant characteristics other than the exposure or the outcome, depending …
I.3. Sample size and statistical power	To appraise this criteria, please consider the number of subjects in reference and in each group should be considered for the appraisal of this criteria	< 20	20–50	≥ 50
II. Study design quality
II.1. Potential of confounding bias	To appraise this criteria, please consider how the authors address the potential confound for at least three following factors: Age-, Sex-, Smoking status (1 = significantly different or no data collected; 2 = not statistically different; 3 = matched or reported by risk factor group	The reported results are significantly different with respect to the age, sex and smoking status or no data on them were collected	The reported results are not significantly different with respect to the age, sex and smoking status	The cases and controls were matched on these factors, or the results are reported by risk factor group (as result of the analyses stratified by age, sex and smoking status)
II.2.a Potential for misclassification bias on the exposure	To appraise this criteria, please consider how measurement of the exposure was done and which data were used for assessing cumulative exposure. If the study design is based on the healthy/ ill participants, please address the criteria II.2b	Assessed by researcher, without individual data, or with only qualitative individual data (questionnaires)	Assessed by the research team including hygienists air measurements and individual data on duration of employment	Assessed based on biological monitoring measurements and individual work history data
II.2.b Potential for misclassification bias on the outcome	To appraise this criteria, please consider how the diagnosis of disease was done	The cases were identified using existent medical records	The cases were examined by a study physician and confirmed as such	All study subjects were examined by the expert physician, and the diagnosis of each case was confirmed using the reference diagnostic procedure
III. Analytical/ technical quality	To appraise this criteria, please consider how thoroughly the laboratory analysis were conducted, in particular whether the author described the comparability of assessment methods if there is more than one group, the solvents used, the detector parameters (e.g., masse, UV-V), the internal or external calibration, and in case of internal calibration, the name/ RT of the compounds (except for immu…	Only LOD and LOQ were specified	Only 1/3 - small half of criteria were specified	More than half or 2/3 of the criteria were specified
III.1. Quality of laboratory analysis
III.2 Measurements by mass spectrometry	Please assign the number of points accordingly to the specifications provided	Only succinct commentary of the method used was provided	The author followed and reporting the recommended guidelines used for their measurements	Full description of the validation of the method and guideline used, transitions, quantifications ions, confirmations ions, retention time of compounds, in case of internal calibration, the name/ RT of the compounds performed was reported
III.3. Measurements by ELISA or other techniques	Please assign the number of points accordingly to the specifications provided	Only succinct commentary of the method used was provided	The author set up their own technique and reported their validated analytical performance	The authors used a commercialized kit recognized as reference used
IV. Quality of the data processing, analysis and result reporting	To appraise this criteria, please consider how thoroughly the statistical methods were described, including the methods used to examine subgroups, confoundings, effect modifications and interactions, how missing data were addressed, and how the statistical significance was assessed. Please consider if the confidence intervals were given for the main results	Only succinct commentary of the method used was provided	Only some of criteria were specified and only p-values were reported for the significance of the results	More than 2/3 of the criteria were specified and confidence intervals were reported for the main results

## Sheet: S2_Study_Subgroups_Final_Score
Subgroup studies	Final score	Quality level < or = 13=Low; 14 to 19 = Moderate; >20 = High
Boonla C	17	Moderate
Boonla C	17	Moderate
Dong QY	17	Moderate
Eom SY	22	High
Eom SY	22	High
Gianni P	16	Moderate
Guo C	18	Moderate
Guo C	18	High
Guo X	22	High
Guo X	22	High
Guo X	22	High
Higashi Y	16	Moderate
Huang YW	20	High
Huang YW	20	High
Inoue K	22	High
Inoue K	22	High
Iwanaga S	20	High
Kamal A	17	Moderate
Kamal A	17	Moderate
Kamal A	21	High
Kamal A	17	Moderate
Kim YJ	18	Moderate
Kiokias S	18	Moderate
Kiokias S	18	Moderate
Kocael A	16	Moderate
Maruhashi T	19	Moderate
Mehrdad R	18	Moderate
Nakanishi S	22	High
Ogino K	22	High
Ogino K	22	High
Ogino K	20	High
Ogino K	20	High
Qiu C	19	Moderate
Sato Y	18	Moderate
Sato Y	18	Moderate
Sugita M	16	Moderate
Sugita M	16	Moderate
Sugita M	16	Moderate
Takaki J	18	Moderate
Takaki J	18	Moderate
Vezzoli A	15	Moderate
Yao Y	17	Moderate
Yavuzer S	17	Moderate
Yavuzer S	17	Moderate
Yuan L	16	Moderate
Zanolin ME	16	Moderate
Zhang J	19	Moderate
Burgess JL	15	Moderate
Burgess JL	15	Moderate
Burgess JL	15	Moderate
García-Rodríguez CE	18	Moderate
Gianni P	16	Moderate
Hakim IA	20	High
Hakim IA	20	High
Hakim IA	20	High
Hakim IA	20	High
Hakim IA	20	High
Hakim IA	20	High
Huang HY	20	High
Huang HY	20	High
Huang HY	20	High
Huang HY	20	High
Leinonen J	18	Moderate
Liu HH	17	Moderate
Miyamoto M	18	Moderate
Parise G	16	Moderate
Shoji H	19	Moderate
Shoji H	19	Moderate
Tarnopolsky M	16	Moderate
Tarnopolsky M	16	Moderate
Tarnopolsky M	16	Moderate
Tarnopolsky M	16	Moderate
Zanolin ME	17	Moderate
Dai X	25	High
Duan H	25	High
El-Bayoumy K	23	High
El-Bayoumy K	23	High
Guilbert A	21	High
Hara M	20	High
Hara M	20	High
Huang YK	17	Moderate
Ke Y	21	High
Kikuchi H	19	Moderate
Kim H	21	High
Kitamura H	22	High
Lee CY	22	High
Li N	19	Moderate
Li N	19	Moderate
Lin HJ	26	High
Miyata M	19	Moderate
Miyata M	19	Moderate
Mizoue T	15	Moderate
Mizoue T	15	Moderate
Mizoue T	15	Moderate
Oba S	17	Moderate
Pan CH	24	High
Pan CH	25	High
Prasad SB	17	Moderate
Shimanoe C	17	Moderate
Traustadóttir T	17	Moderate
Traustadóttir T	17	Moderate
Wang CC	20	High
Wang CC	20	High
Wong RH	17	Moderate
Yi S	13	Low
Yi S	13	Low
Chen CHS	18	Moderate
Jeng HA	18	Moderate
Liu AL	22	High
Mazlumoglu MR	17	Moderate
Mazlumoglu MR	17	Moderate
Mazlumoglu MR	17	Moderate
Toraason M	21	High
